# Supplementary material for: Apoptotic mechanism activated by blue light and cisplatinum in cutaneous squamous cell carcinoma cells
Source: PubMed Central journal article supplement — Int J Mol Med. 2021 Feb 9;47(4):48. doi: 10.3892/ijmm.2021.4881 (PMC7891828; doi:10.3892/ijmm.2021.4881), 2021-02-09

Figure S1. Representative western blots for Casp-9, Casp-8, Casp-3, Bid, Bax, Cyt c, p53 and Aif bands of (A) A431 and (B) HaCaT cell lines. Casp, caspase; tBid, truncated BH3 interacting domain death agonist; Bax, Bcl-2-associated X protein; Cyt c, cytochrome c; Aif, anti-apoptosis independent.

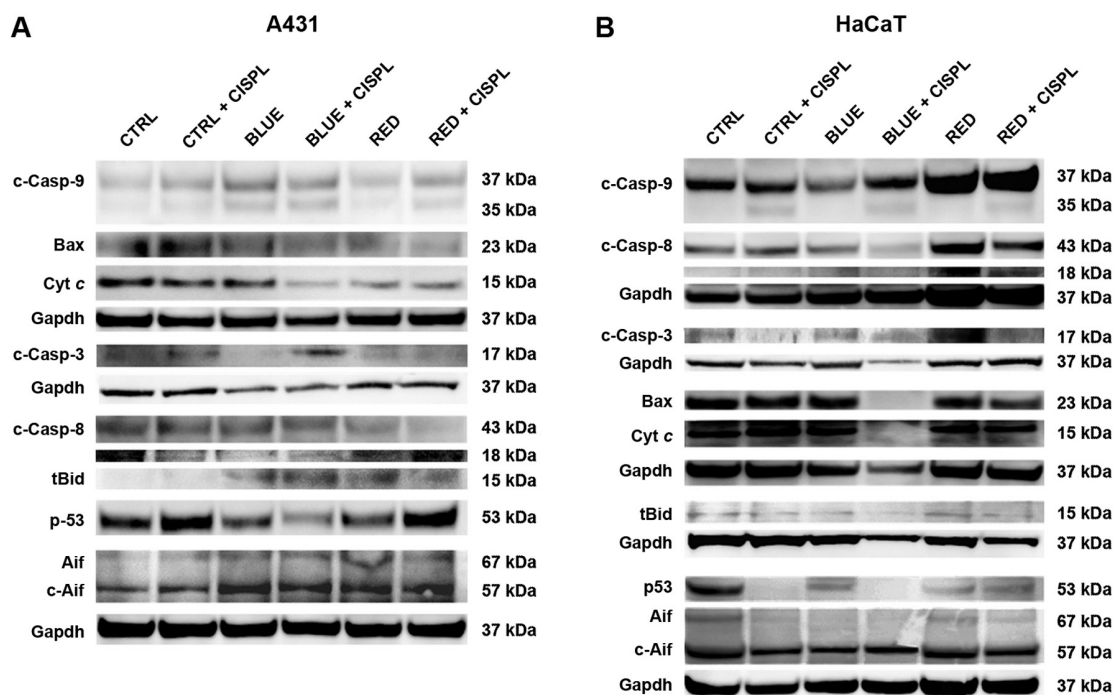

Figure S2. Analysis of cell viability in (A) A431 and (B) HaCaT cell lines under exposure to LED, 5-fluorouracil, and LED and 5-fluorouracil combined. Columns represent mean values and bars represent  $\pm$  SD (n=3). \*P<0.05 and \*\*\*P<0.001 vs. CTRL. ##P<0.01 and ###P<0.001. LED, light-emitting diode; 5-FU, 5-fluorouracil; SD, standard deviation.

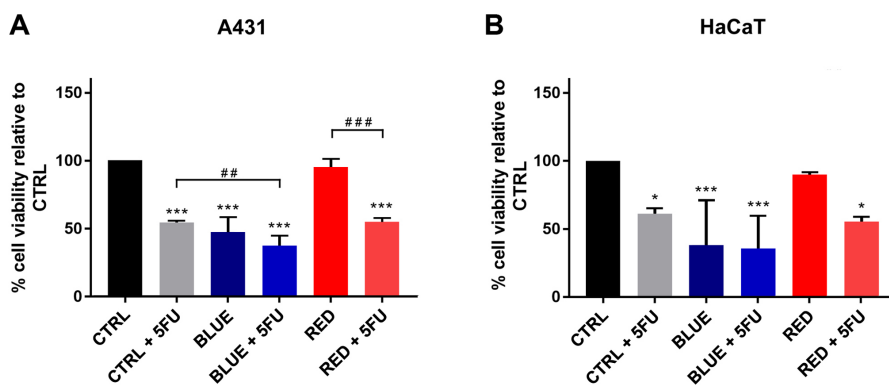

Supplement: Supplementary_Data.pdf [file Supplementary_Data.pdf]
